# Supplementary material
Source: MDPI journal article supplement (https://www.mdpi.com/2673-8023/3/2/42)
Supplement: s1 [file s1]

## Supporting Information for

Selective hydrodeoxygenation of guaiacol to cyclohexane over Ru-catalysts based on MFI  
nanosheets

*Dmitry Tsaplin,<sup>a</sup> Alexey Sadovnikov,<sup>a</sup> Valeriya Ryleeva,<sup>b</sup> Dzhamalutdin Ramazanov,<sup>a</sup> Dmitry Gorbunov<sup>a,b</sup> Anton Maximov, Kaige Wang<sup>c</sup> and Evgeny Naranov<sup>a\*</sup>*

a. Topchiev Institute of Petrochemical Synthesis, Russian Academy of Sciences, Leninsky prospekt, bld. 29, 119991, Moscow, Russia

b. Lomonosov Moscow State University, Leninskie Gory, 1, 119991, Moscow, Russia

c. State Key Laboratory of Clean Energy Utilization, Zhejiang University, Hangzhou 310027, China

corresponding author –Evgeny Naranov, naranov@ips.ac.ru

**Table S1.** Selectivity over different catalysts. Reaction conditions: 200 °C, 50 bar H<sub>2</sub>, catalysts mass 0.05 g, 2.00 g of substrate (10 wt. % of guaiacol in n-C<sub>12</sub>H<sub>34</sub>).

| Selectivity              | Ru/ZNS-12 | Ru/ZNS-24 | Ru/ZNS-56 | Ru/ZSM-5 |
|--------------------------|-----------|-----------|-----------|----------|
| <b>0.25 hours</b>        |           |           |           |          |
| <i>Conversion, wt. %</i> | 32        | 37        | 49        | 50       |
| 2-methoxycyclohexanol    | 91        | 62        | 3         | 5        |
| cyclohexanol             | 9         | 48        | 40        | 40       |
| cyclohexane              | 0         | 0         | 57        | 55       |
| <b>0.5 hours</b>         |           |           |           |          |
| <i>Conversion, wt. %</i> | 61        | 65        | 82        | 76       |
| 2-methoxycyclohexanol    | 43        | 50        | 4         | 5        |
| cyclohexanol             | 57        | 48        | 20        | 20       |
| cyclohexane              | 0         | 2         | 76        | 75       |
| <b>1 hour</b>            |           |           |           |          |
| <i>Conversion, wt. %</i> | 91        | 94        | 98        | 94       |
| 2-methoxycyclohexanol    | 26        | 23        | 0         | 0        |
| cyclohexanol             | 69        | 67        | 0         | 5        |
| cyclohexane              | 5         | 10        | 100       | 95       |
| <b>3 hours</b>           |           |           |           |          |
| <i>Conversion, wt. %</i> | 96        | 98        | 98        | 97       |
| 2-methoxycyclohexanol    | 20        | 15        | 0         | 0        |

|              |    |    |     |     |
|--------------|----|----|-----|-----|
| cyclohexanol | 67 | 65 | 0   | 0   |
| cyclohexane  | 13 | 20 | 100 | 100 |

**Table S2.** Selectivity over different catalysts. Reaction conditions: 50 bar H<sub>2</sub>, 1 hour, catalysts mass 0.05 g, 2.00 g of substrate (10 wt. % of guaiacol in n-C<sub>12</sub>H<sub>34</sub>).

| Selectivity                              | Ru/ZNS-12 | Ru/ZNS-24 | Ru/ZNS-56 | Ru/ZSM-5 |
|------------------------------------------|-----------|-----------|-----------|----------|
| 150 °C                                   |           |           |           |          |
| <i>Conversion, wt. %</i>                 | 44        | 60        | 68        | 68       |
| 2-methoxycyclohexanol                    | 100       | 89        | 43        | 35       |
| cyclohexanol                             | 0         | 11        | 37        | 40       |
| cyclohexane                              | 0         | 0         | 20        | 25       |
| 200 °C                                   |           |           |           |          |
| <i>Conversion, wt. %</i>                 | 91        | 94        | 98        | 94       |
| 2-methoxycyclohexanol                    | 26        | 23        | 0         | 0        |
| cyclohexanol                             | 69        | 67        | 0         | 5        |
| cyclohexane                              | 5         | 10        | 100       | 95       |
| 250 °C                                   |           |           |           |          |
| <i>Conversion, wt. %</i>                 | 98        | 97        | 98        | 100      |
| 2-methoxycyclohexanol                    | 17        | 0         | 0         | 0        |
| cyclohexanol                             | 74        | 79        | 0         | 0        |
| cyclohexane                              | 9         | 21        | 100       | 95       |
| Cracking products<br>(Carbon number < 6) | 0         | 0         | 0         | 5        |
| 300 °C                                   |           |           |           |          |
| <i>Conversion, wt. %</i>                 | 99        | 98        | 100       | 100      |
| 2-methoxycyclohexanol                    | 3         | 1         | 0         | 0        |
| cyclohexanol                             | 84        | 79        | 0         | 0        |
| cyclohexane                              | 13        | 20        | 96        | 85       |
| Cracking products<br>(Carbon number < 6) | 0         | 0         | 4         | 15       |
